# Supplementary material
Source: MDPI journal article supplement (https://www.mdpi.com/2073-4344/12/1/85)
Supplement: s1 [file s1 › catalysts-1550958-supplementary.pdf]

# VOCs photothermo-catalytic removal on $\text{MnO}_x\text{-ZrO}_2$ catalysts

Roberto Fiorenza <sup>1,\*</sup>, Roberta Agata Farina <sup>1</sup>, Enrica Maria Malannata <sup>1</sup>; Francesca Lo Presti<sup>1</sup>, and Stefano Andrea Balsamo <sup>1</sup>

Supporting information

- S1: SEM images of the other investigated samples

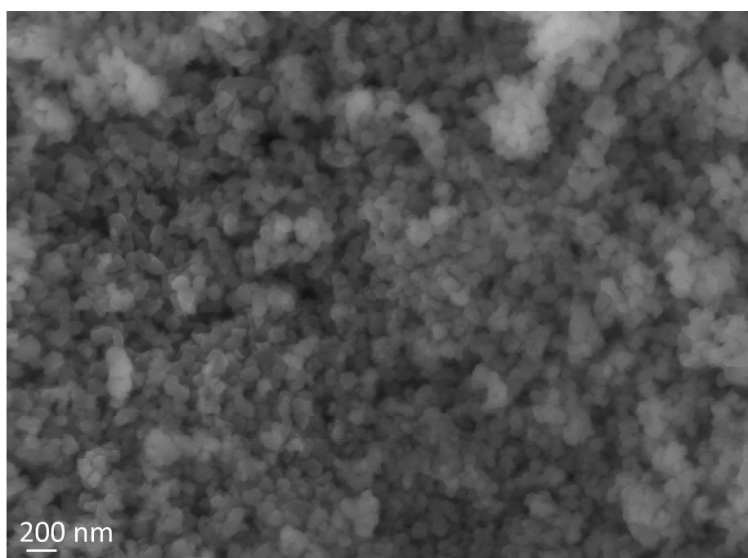

(a)

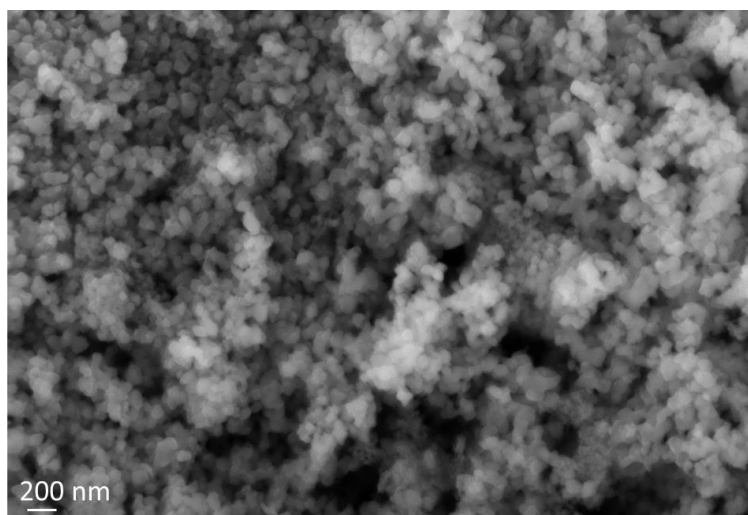

(b)

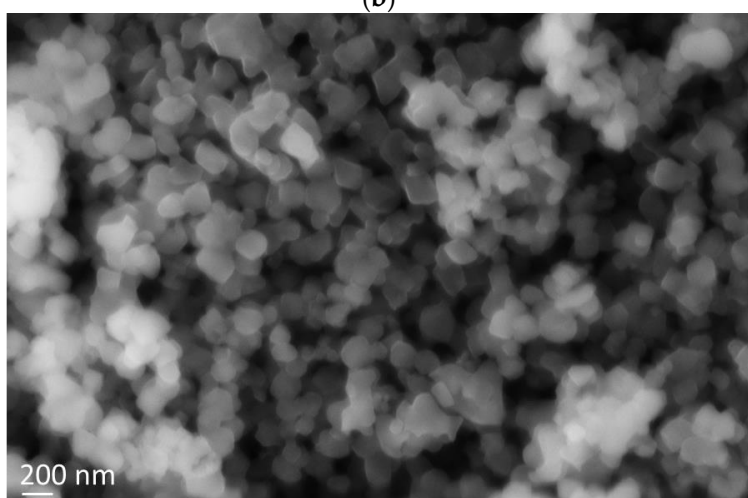

(c)

**Figure S1.** SEM images of: (a) ZrO<sub>2</sub>; (b) Mn<sub>3</sub>O<sub>4</sub> and (c) MnO<sub>x</sub>-10%ZrO<sub>2</sub>.

- S2: XPS characterization of the MnO<sub>x</sub>-5% ZrO<sub>2</sub> sample

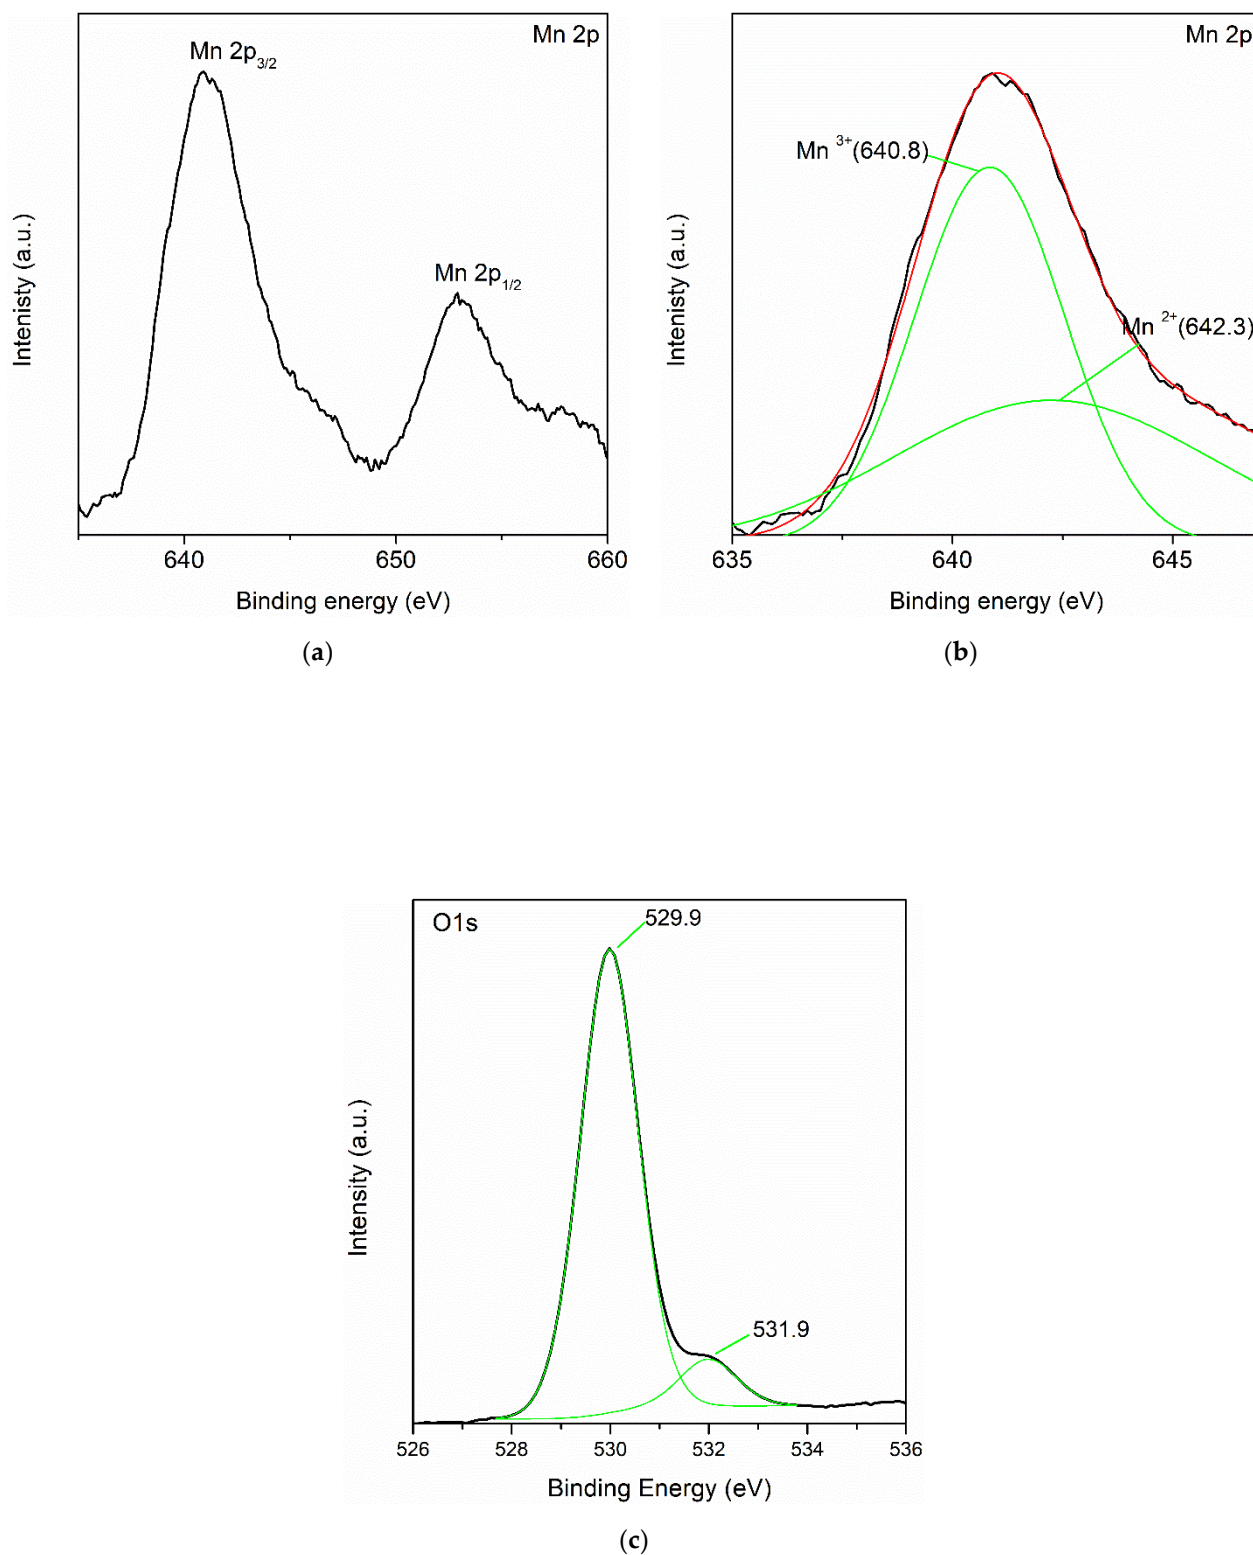

**Figure S2.** XPS spectra of the MnO<sub>x</sub>-5% ZrO<sub>2</sub> as representative samples. In the (a and b) the Mn 2p region and in (c) the O 1s region. In the figures S2b and S2c there are present the deconvolution features. The components at 640.8 and 642.3 eV were ascribed to Mn<sup>3+</sup> and Mn<sup>2+</sup> species, respectively [1]. The peaks at 529.9 and 531.9 eV refer to surface lattice oxygen and chemisorbed/defective oxygen, respectively [2]. The red line superimposed to the experimental profiles refers to the sum of all the Gaussian components. Structure due to satellite radiation has been subtracted from the spectra.

- S3: Photothermo-catalytic oxidation of toluene: influence of different parameters on MnO<sub>x</sub>-5% ZrO<sub>2</sub> sample

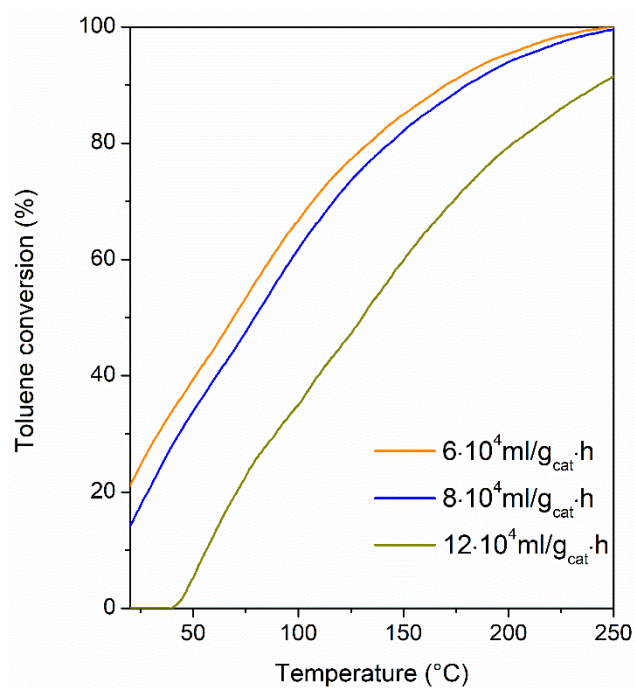

(a)

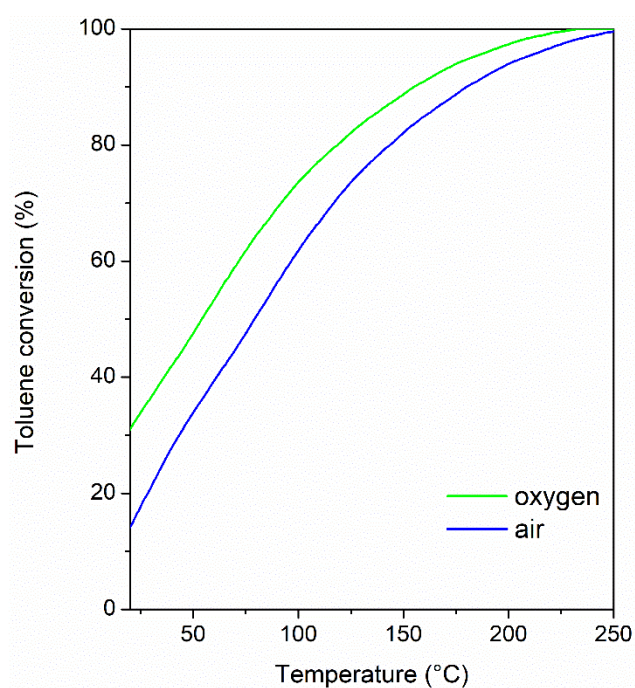

(c)

**Figure S3.** Influence of different parameters in the photothermo-catalytic oxidation of toluene using the MnO<sub>x</sub>-5% ZrO<sub>2</sub> sample: (a) influence of the flow rates; (b) influence of air or oxygen in the gas mixture.

- **S4: Thermocatalytic oxidation of ethanol**

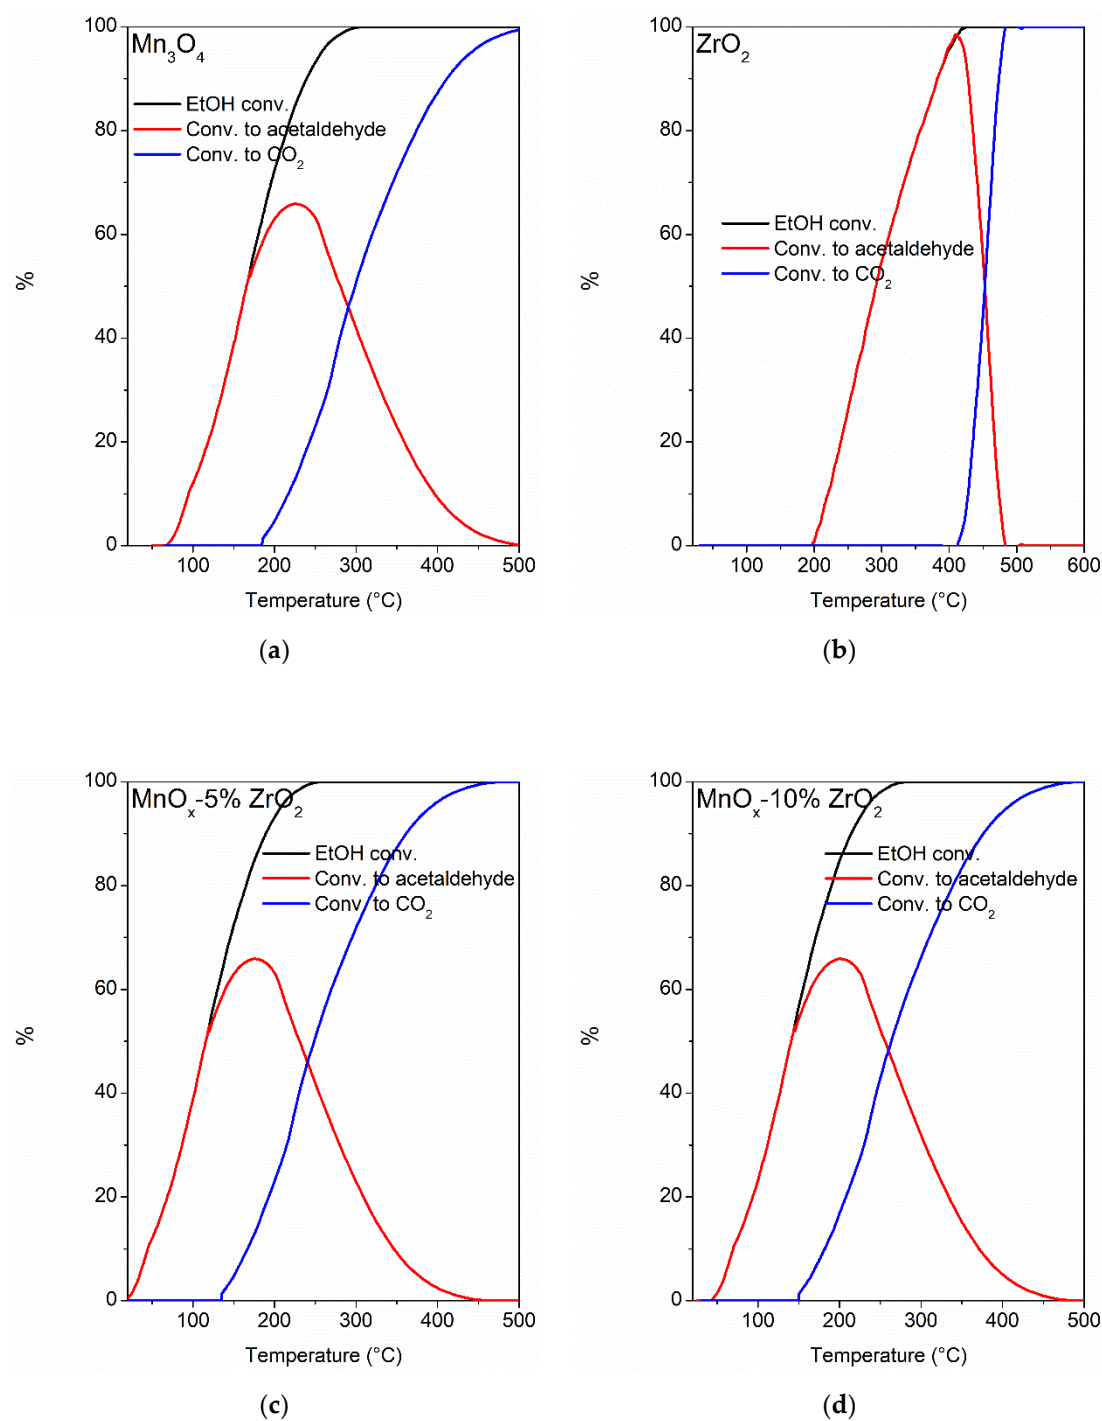

**Figure S4.** Thermocatalytic oxidation of ethanol: (a)  $\text{Mn}_3\text{O}_4$ ; (b)  $\text{ZrO}_2$ ; (c)  $\text{MnO}_x\text{-5\%ZrO}_2$ ; (d)  $\text{MnO}_x\text{-10\%ZrO}_2$ .

- **S5: Photothermo-catalytic oxidation of ethanol**

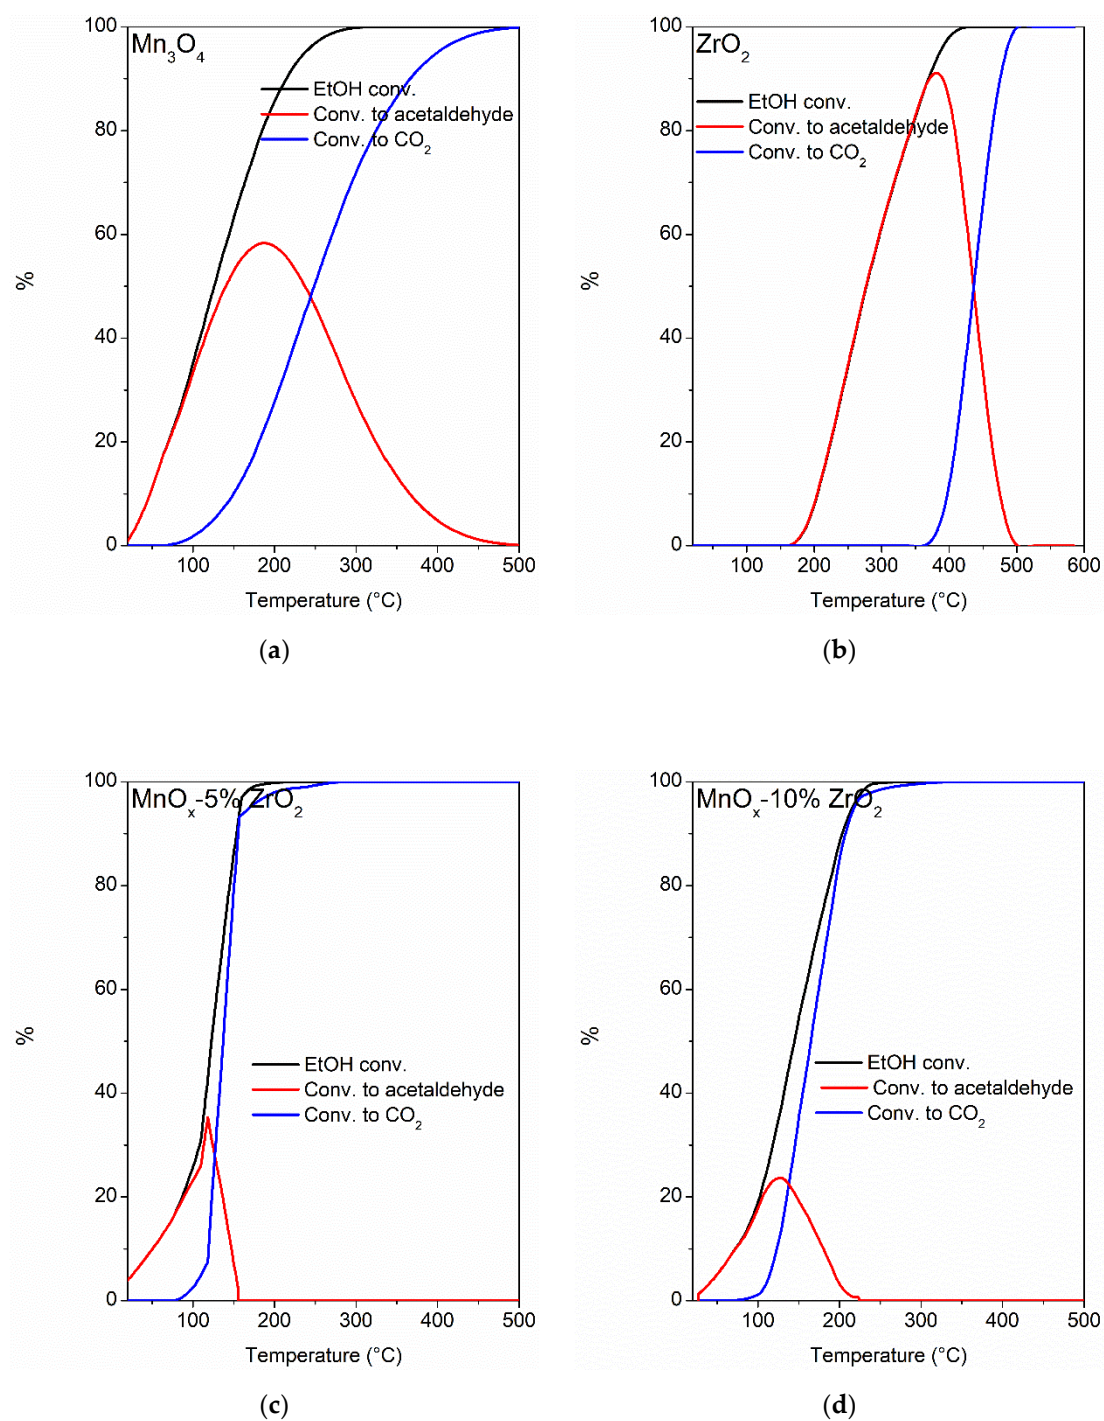

**Figure S5.** Photothermo-catalytic oxidation of ethanol: (a)  $\text{Mn}_3\text{O}_4$ ; (b)  $\text{ZrO}_2$ ; (c)  $\text{MnO}_x$ -5%  $\text{ZrO}_2$ ; (d)  $\text{MnO}_x$ -10%  $\text{ZrO}_2$ .

## References:

1. Wang, Y.; Hao, J.; Li, W.; Zuo, X.; Xiang, B.; Qiang, Y.; Zou, X.; Tan, B.; Hu, Q.; Chen, F. Mn<sub>3</sub>O<sub>4</sub>/Co(OH)<sub>2</sub> cactus-type nanoarrays for high-energy-density asymmetric supercapacitors. *J. Mater. Sci.* **2020**, *55*, 724–737.
2. Zuo, J.; Chen, Z.; Wang, F.; Yu, Y.; Wang, L.; Li, X. Low-Temperature Selective Catalytic Reduction of NO<sub>x</sub> with NH<sub>3</sub> over Novel Mn–Zr Mixed Oxide Catalysts. *Ind. Eng. Chem. Res.* **2014**, *53*, 2647–2655.
